# Supplementary material for: Exosomal circ_0084043 derived from colorectal cancer-associated fibroblasts promotes in vitro endothelial cell angiogenesis by regulating the miR-140–3p/HIF-1α/VEGF signaling axis
Source: PubMed Central journal article supplement — Heliyon. 2024 May 20;10(11):e31584. doi: 10.1016/j.heliyon.2024.e31584 (PMC11140710; doi:10.1016/j.heliyon.2024.e31584), 2024-05-20
Supplement: mmc1.pdf [file mmc1.pdf]

# Supplementary Table S1

**Supplementary Table S1.** The clinicopathological characteristics of CRC patients

| <b>Features</b>    | <b>No. of<br/>CRC patients<br/>(%)</b> | <b>No. of<br/>HC individuals<br/>(%)</b> |
|--------------------|----------------------------------------|------------------------------------------|
| <b>Age (years)</b> |                                        |                                          |
| <50                | 16 (36)                                | 10 (33)                                  |
| ≥50                | 29 (64)                                | 20 (67)                                  |
| <b>Gender</b>      |                                        |                                          |
| Male               | 36 (80)                                | 22 (73)                                  |
| Female             | 9 (20)                                 | 8 (27)                                   |
| <b>Position</b>    |                                        |                                          |
| Colon              | 18 (40)                                |                                          |
| Rectal             | 27 (60)                                |                                          |
| <b>Tumor size</b>  |                                        |                                          |
| <2 cm              | 19 (42)                                |                                          |
| ≥2 cm              | 26 (58)                                |                                          |
| <b>LNM</b>         |                                        |                                          |
| Metastasis         | 18 (40)                                |                                          |
| No metastasis      | 27 (60)                                |                                          |
| <b>Tumor stage</b> |                                        |                                          |
| I+II               | 28 (62)                                |                                          |
| III                | 17 (38)                                |                                          |

Abbreviations: CRC, Colorectal cancer; HC, Healthy controls; LNM, Lymph node metastasis

## Supplementary Figure S1

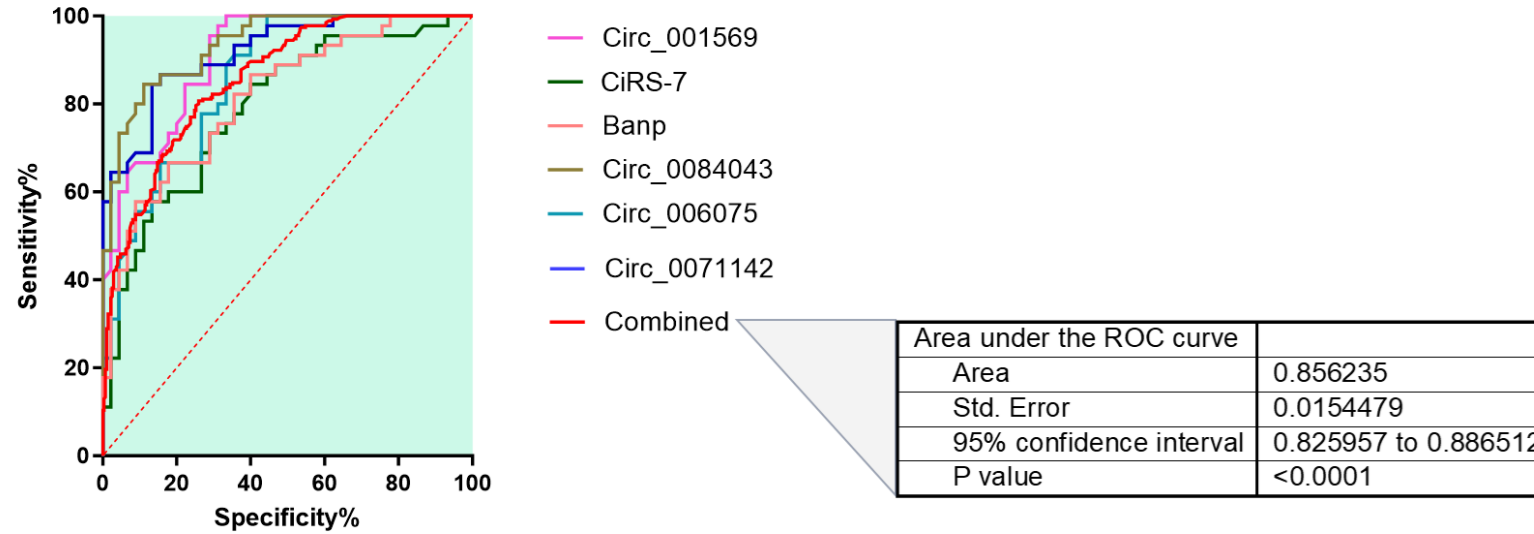

**Supplementary Figure S1.** Diagnostic value of the expression of six candidate circRNAs. ROC curves were used to compare the diagnostic accuracy of each circRNA in discriminating CRC patients from healthy individuals. ROC curve was also generated to assess the combined analysis of six circRNAs, aiming to discriminate between CRC patients and healthy individuals.

## Supplementary Figure S2

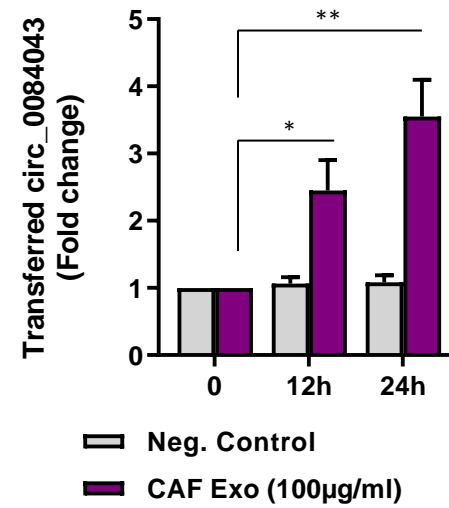

**Supplementary Figure S2.** Transfer of circ\_0084043 was determined by qRT-PCR in HUVECs incubated with both CAF Exo (100 µg/ml) and  $\alpha$ -amanitin (Sigma, 50 µg/ml) compared to  $\alpha$ -amanitin only treated cells (Neg. control) at time points 0, 12 and 24 h. Columns represent means of three different experiments, and bars represent standard deviation (SD). \*  $p$ -value < 0.05, \*\*  $p$ -value < 0.01.

## Supplementary Figure S3

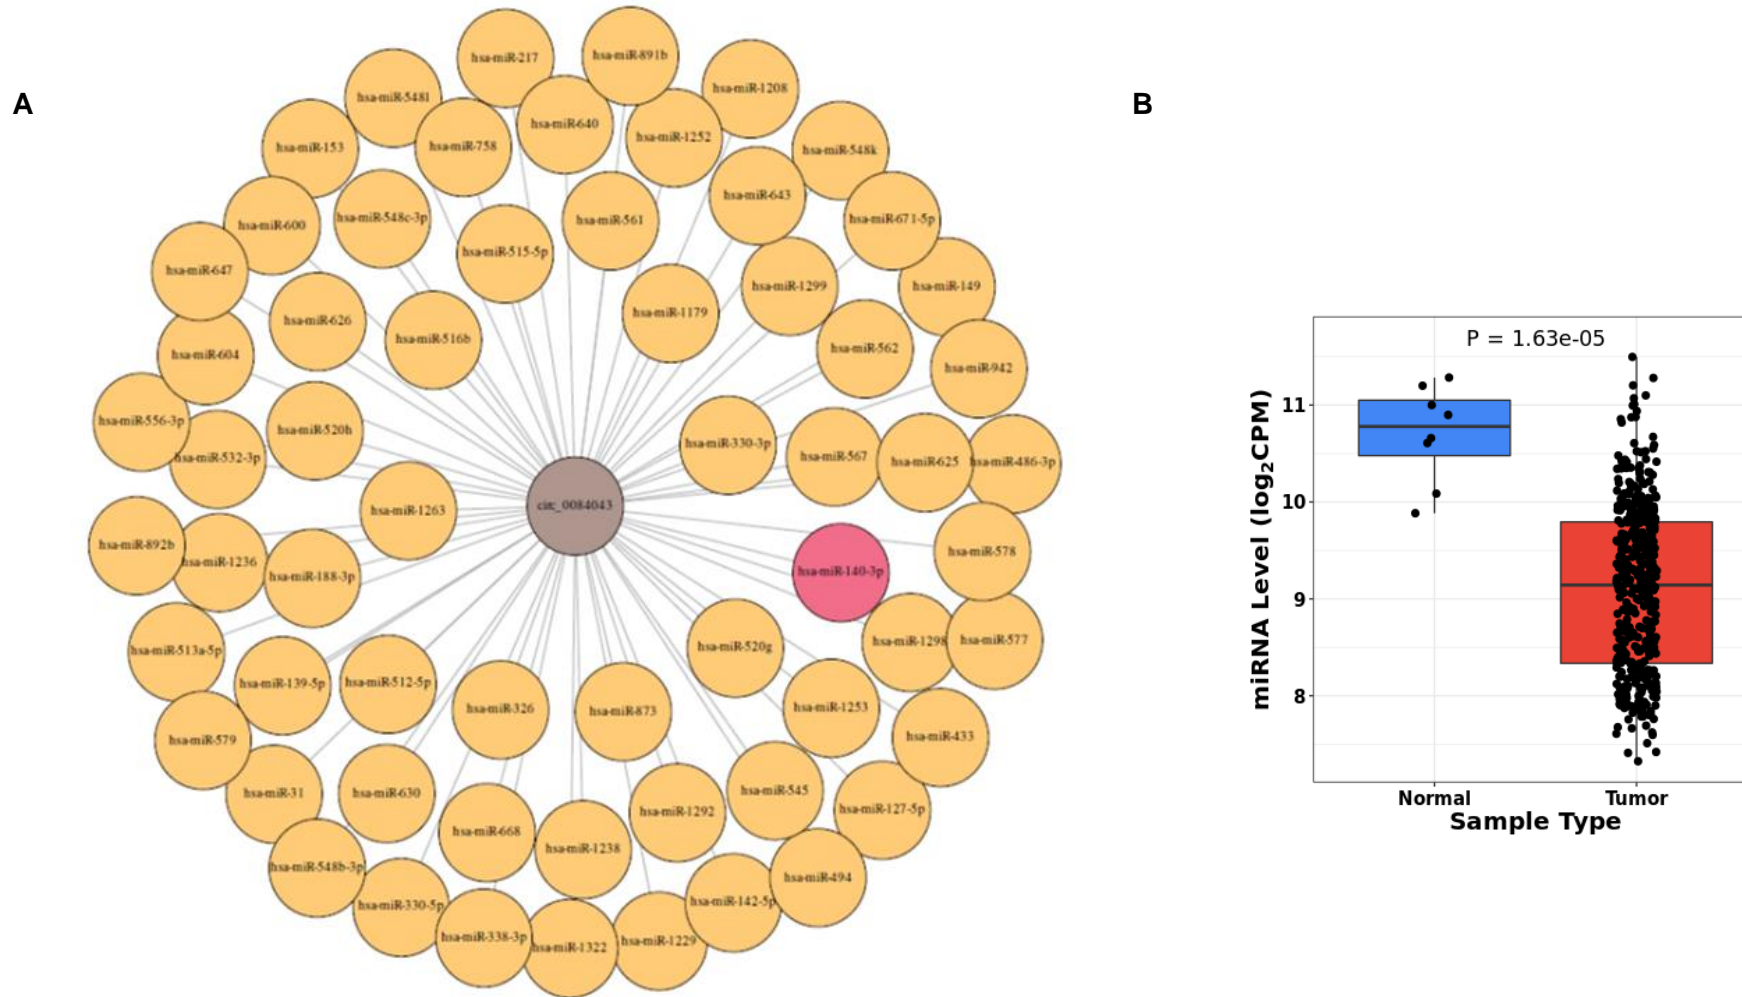

**Supplementary Figure S3. *In silico* analysis.** **A.** Circinteractome was used to predict miRNAs with binding potential to circ\_0084043. **B.** CancerMIRNome was used to evaluate if the expression of miR-140 is changed in CRC or not. The gene expression analysis using CancerMIRNome suggested low expression of miR-140-3p in CRC patients.

## Supplementary Figure S4

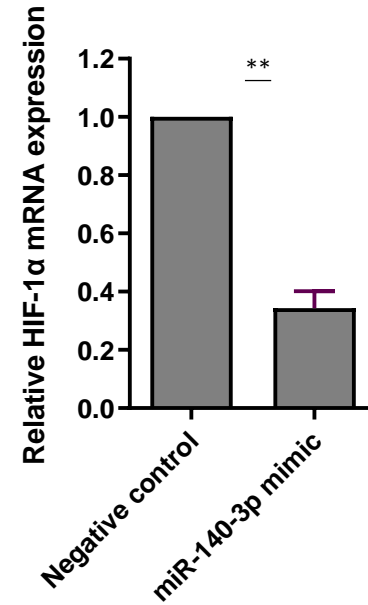

**Supplementary Figure S4.** The transcript expression of HIF-1 $\alpha$  decreased when HUVECs were transfected with the miR-140-3p mimic, suggesting an inhibitory effect of this miRNA on HIF-1 $\alpha$  expression. Columns represent means of three different experiments, and bars represent standard deviation (SD). \*\*  $p$ -value < 0.01.

# Supplementary Figs. S5-10

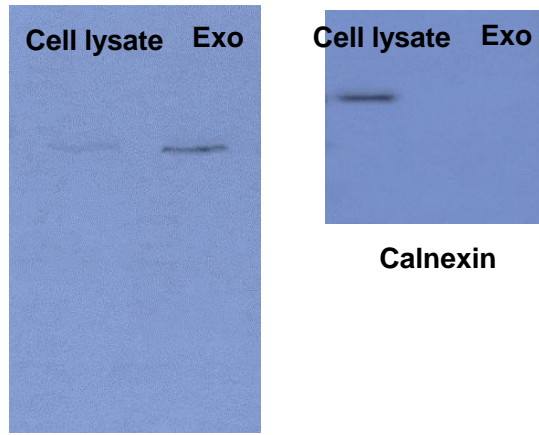

**CD9**

Supplementary Figure S5. Western blots raw data. The full-length blots of Calnexin and CD9.

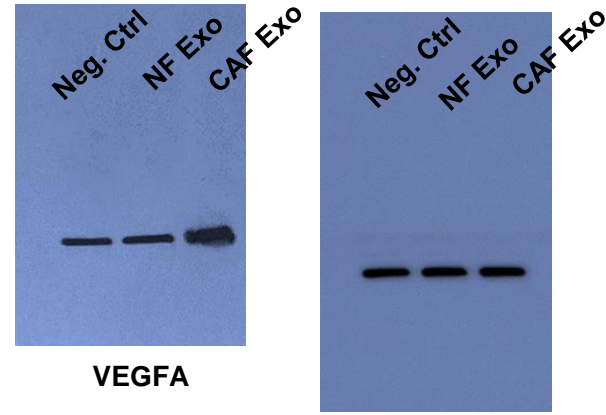

**VEGFA**

**β-actin**

Supplementary Figure S6. Western blots raw data. The full-length blots of VEGF and β-actin.

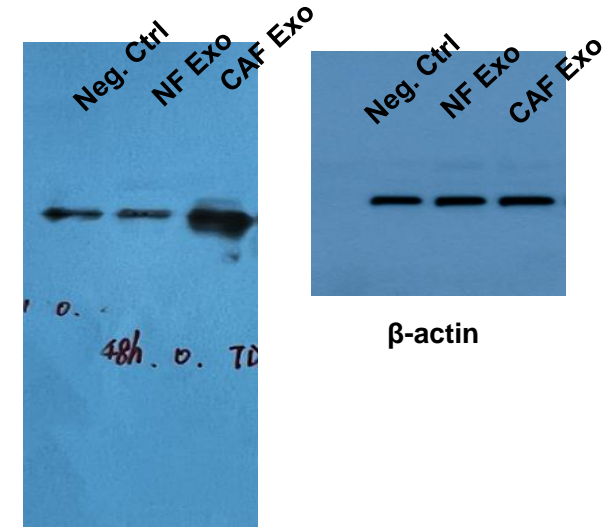

**P-VEGFR2**

Supplementary Figure S7. Western blots raw data. The full-length blots of p-VEGFR2 and β-actin.

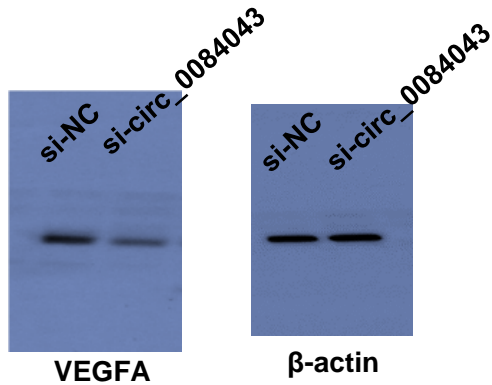

**VEGFA**

**β-actin**

Supplementary Figure S8. Western blots raw data. The full-length blots of VEGF and β-actin.

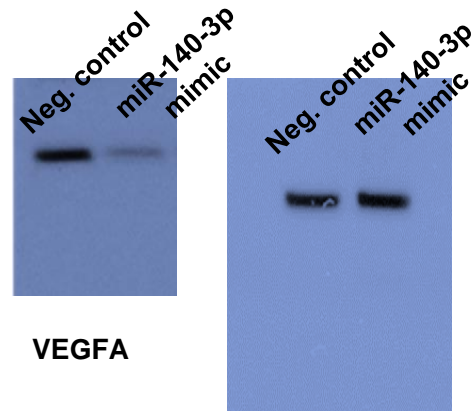

**VEGFA**

**β-actin**

Supplementary Figure S9. Western blots raw data. The full-length blots of VEGF and β-actin.

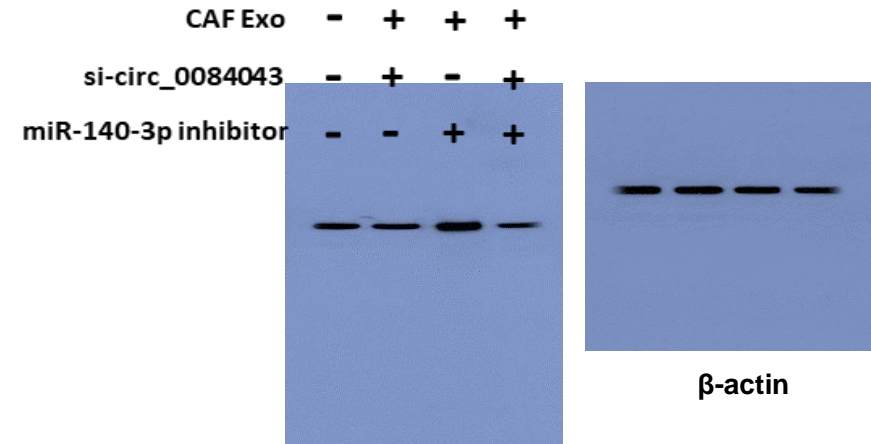

**VEGFA**

**β-actin**

Supplementary Figure S10. Western blots raw data. The full-length blots of VEGF and β-actin.
